# Supplementary material for: Achieving excellent activity and stability for oxygen reduction electrocatalysis by hollow mesoporous iron–nitrogen-doped graphitic carbon spheres
Source: Royal Society of Chemistry journal article supplement (doi:10.1039/c7ta01896g), 2017-01-01
Supplement: c7ta01896g1.pdf [file c7ta01896g1.pdf]

**Electronic Supplementary Information:**

**Achieving Excellent Activity and Stability for Oxygen Reduction  
Electrocatalysis by Hollow Mesoporous Iron-Nitrogen-Doped  
Graphitic Carbon Spheres**

Tingsheng Zhou,<sup>ab</sup> Yao Zhou,<sup>a</sup> Ruguang Ma,<sup>a</sup> Qian Liu,<sup>ac\*</sup> Yufang Zhu,<sup>b\*</sup> and  
Jiacheng Wang<sup>ac\*</sup>

<sup>a</sup> State Key Laboratory of High Performance Ceramics and Superfine Microstructure,  
Shanghai Institute of Ceramics, Chinese Academy of Sciences, 1295 Dingxi Road,  
Shanghai 200050, P. R. China.

<sup>b</sup> School of Materials Science and Engineering, University of Shanghai for Science and  
Technology, 516 Jungong Road, Shanghai 200093, P. R. China.

<sup>c</sup> Shanghai Institute of Materials Genome, Shanghai, P. R. China.

\*Email - Jiacheng.wang@mail.sic.ac.cn

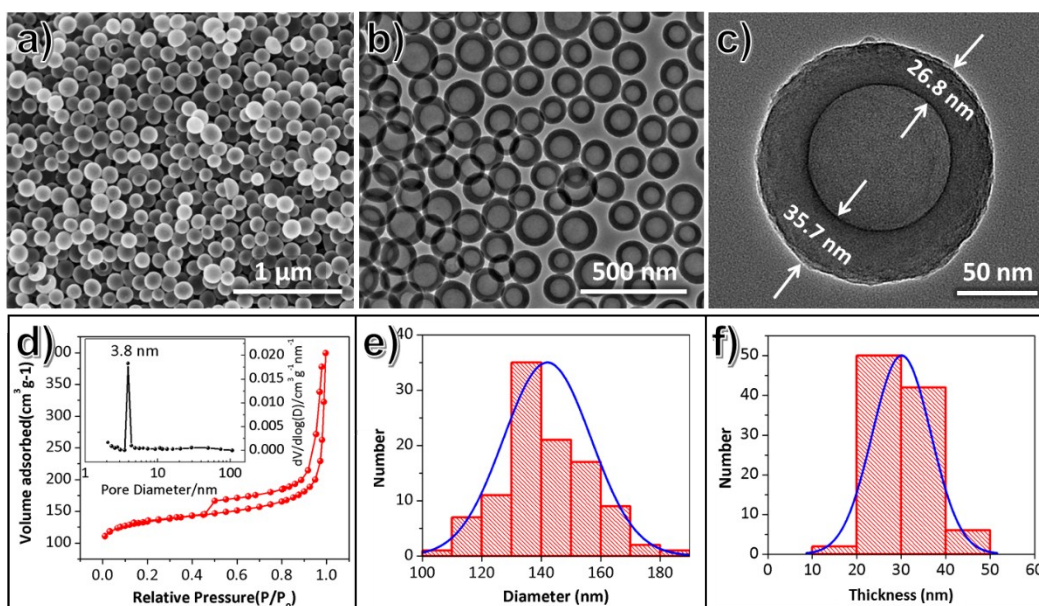

**Fig. S1** a) SEM image, b-c) TEM images, d) Nitrogen adsorption-desorption isotherms and pore size distribution (inset), e) particle size distribution, and f) shell thicknesses distribution of the hollow polymer spheres (HPS).

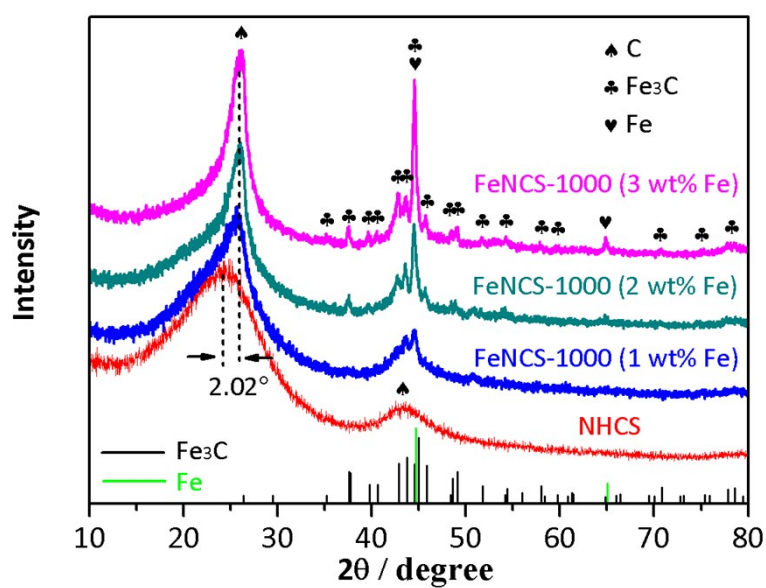

**Fig. S2** XRD patterns of NHCS and FeNCS-1000 with 1, 2 and 3 wt% Fe. The diffraction peaks

ascribed to Fe/Fe<sub>3</sub>C evidently increase with increasing the Fe content in the precursors.

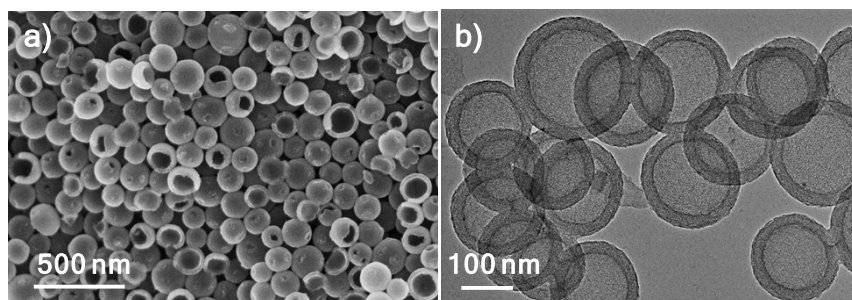

**Fig. S3** a) SEM and b) TEM images of NHCS prepared by pyrolysis of NHCS-650 at 1000 °C in Ar.

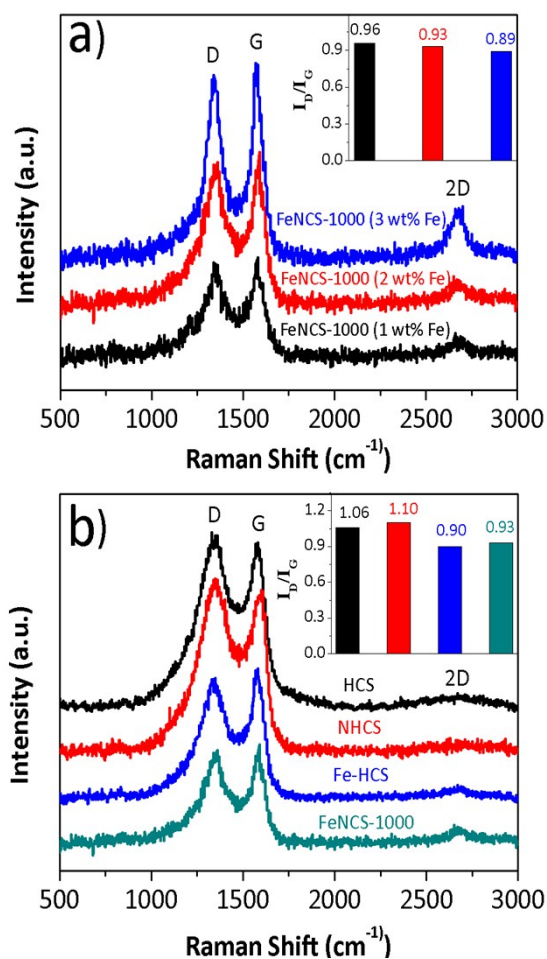

**Fig. S4** a) Raman spectra of FeNCS-1000 prepared with 1, 2 and 3 wt% Fe, respectively. b) Raman spectra of HCS, NHCS, Fe-HCS and FeNCS-1000 (2 wt% Fe). The insets in a) and b) are the ratios of I<sub>D</sub> to I<sub>G</sub> for the corresponding samples. As illustrated in the histograms in Fig. S4, the value for I<sub>D</sub> /I<sub>G</sub> of FeNCS-1000 decreases with increasing Fe content, indicating that Fe source can promote

the graphitization of carbon material and higher pyrolysis temperature results in higher graphitization degree for Fe-doped samples.

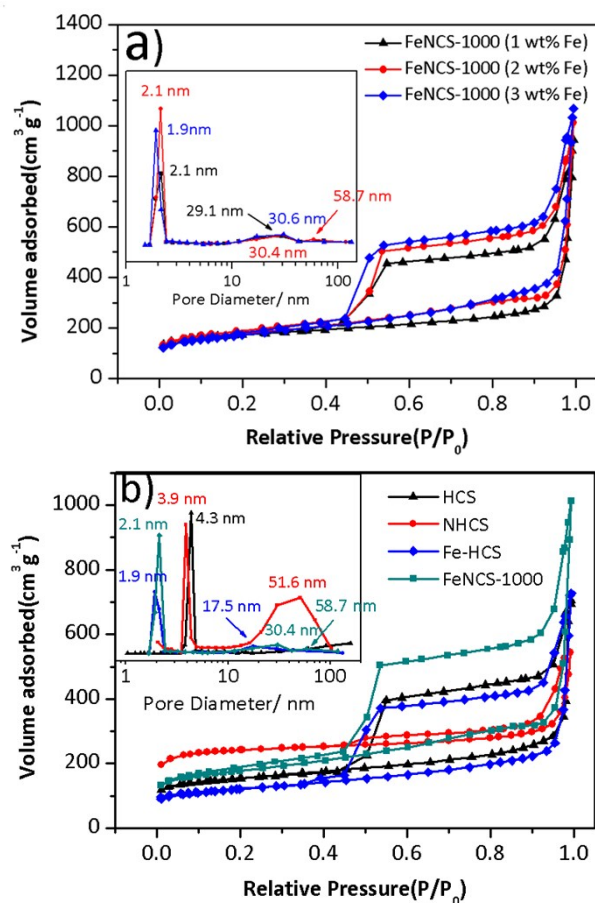

**Fig. S5** Nitrogen adsorption-desorption isotherms and pore-size distributions (insets) of a) FeNCS-1000 with different Fe content and b) HCS, NHCS, Fe-HCS and FeNCS-1000. As shown in Fig. S5, except for the small mesopores at ~2 nm, another pores of 17.5-58.7 nm were also observed for FeNCS-1000. In addition, only one single pore (4.3 nm) could be observed for HCS, but N-doped HCS (NHCS) created new pore centered at 51.6 nm. The pores of FeNCS-1000 decreased to 2.1 and 30.4 nm compared with that of NHCS (3.9 and 51.6 nm), and new pore (58.7 nm) was formed. This is because of further shrinkage and enhanced graphitization of the carbon spheres due to the introduction of Fe source.

**Table S1.** Comparison for the texture parameters including BET surface area, pore size and pore volume of FeNCSs prepared with 2 wt% Fe at different temperature. The N<sub>2</sub> sorption isotherms are shown in Fig. 1 of the main text.

| Samples    | S <sub>BET</sub> <sup>a</sup> (m <sup>2</sup> g <sup>-1</sup> ) | V <sub>total</sub> <sup>b</sup> (cm <sup>3</sup> g <sup>-1</sup> ) | Pore size <sup>c</sup> (nm) |
|------------|-----------------------------------------------------------------|--------------------------------------------------------------------|-----------------------------|
| FeNCS-800  | 597                                                             | 0.99                                                               | 2.1, 17.5-58.7              |
| FeNCS-900  | 524                                                             | 1.10                                                               | 2.1, 17.5-58.7              |
| FeNCS-1000 | 613                                                             | 1.57                                                               | 2.1, 17.5-58.7              |
| FeNCS-1100 | 423                                                             | 1.04                                                               | 1.9, 17.5-58.7              |

<sup>a</sup>Determined by the BET method at P/P<sub>0</sub> of 0.05–0.15. <sup>b</sup>Total pore volume for pores with Radius less than 1640.51 Å at P/P<sub>0</sub> = 0.99. <sup>c</sup>Maxima of the pore size distribution determined by the BJH method desorption data.

**Table S2.** Comparison for the texture parameters including BET surface area, pore size and pore volume of FeNCS-1000 with different Fe content.

| Samples               | S <sub>BET</sub> <sup>a</sup> (m <sup>2</sup> g <sup>-1</sup> ) | V <sub>total</sub> <sup>b</sup> (cm <sup>3</sup> g <sup>-1</sup> ) | Pore size <sup>c</sup> (nm) |
|-----------------------|-----------------------------------------------------------------|--------------------------------------------------------------------|-----------------------------|
| FeNCS-1000 (1 wt% Fe) | 593                                                             | 1.46                                                               | 2.1, 17.5-58.7              |
| FeNCS-1000 (2 wt% Fe) | 613                                                             | 1.57                                                               | 2.1, 17.5-58.7              |
| FeNCS-1000            | 600                                                             | 1.65                                                               | 1.9, 17.5-58.7              |

(3 wt% Fe)

<sup>a</sup>Determined by the BET method at P/P<sub>0</sub> of 0.05–0.15. <sup>b</sup>Total pore volume for pores with Radius less than 1640.51 Å at P/P<sub>0</sub> = 0.99. <sup>c</sup>Maxima of the pore size distribution determined by the BJH method desorption data.

**Table S3.** Comparison for the texture parameters including BET surface area, pore size and pore volume of HPS, HCS, Fe-HCS, NHCS and FeNCS-1000 (2 wt% Fe).

| Samples    | S <sub>BET</sub> <sup>a</sup> (m <sup>2</sup> g <sup>-1</sup> ) | V <sub>total</sub> <sup>b</sup> (cm <sup>3</sup> g <sup>-1</sup> ) | Pore size <sup>c</sup> (nm) |
|------------|-----------------------------------------------------------------|--------------------------------------------------------------------|-----------------------------|
| HPS        | 455                                                             | 0.35                                                               | 3.8                         |
| HCS        | 524                                                             | 0.48                                                               | 4.3                         |
| Fe-HCS     | 419                                                             | 1.13                                                               | 1.9, 17.5                   |
| NHCS       | 820                                                             | 0.56                                                               | 3.9, 51.6                   |
| FeNCS-1000 | 613                                                             | 1.57                                                               | 2.1, 17.5-58.7              |

<sup>a</sup>Determined by the BET method at P/P<sub>0</sub> of 0.05–0.15. <sup>b</sup>Total pore volume for pores with Radius less than 1640.51 Å at P/P<sub>0</sub> = 0.99. <sup>c</sup>Maxima of the pore size distribution determined by the BJH method desorption data.

**Table S4.** The contents of C, O, N and relative N species analyzed by N1s XPS spectra of the FeNCSs prepared at different temperature of 800-1100 °C.

| Samples   | C <sup>a</sup> (at%) | O <sup>a</sup> (at%) | N <sup>a</sup> (at%) | pyridinic-N <sup>b</sup> (at%) | Fe-N <sub>x</sub> <sup>b</sup> (at%) | graphiti <sup>c</sup> -N <sup>b</sup> (at%) | oxidized-N <sup>b</sup> (at%) |
|-----------|----------------------|----------------------|----------------------|--------------------------------|--------------------------------------|---------------------------------------------|-------------------------------|
| FeNCS-800 | 85.4                 | 6.4                  | 7.6                  | 39.92                          | 27.13                                | 23.26                                       | 9.69                          |
| FeNCS-900 | 87.4                 | 7.1                  | 5.0                  | 36.77                          | 28.81                                | 25.27                                       | 9.15                          |

|                |      |     |     |       |       |       |      |
|----------------|------|-----|-----|-------|-------|-------|------|
| FeNCS-<br>1000 | 91.5 | 5.7 | 2.5 | 23.41 | 38.85 | 28.86 | 8.88 |
| FeNCS-<br>1100 | 93.5 | 4.7 | 1.6 | 15.60 | 29.25 | 47.76 | 7.68 |

<sup>a</sup>The C, O, N and Fe content of FeNCS-800, 900, 1000 and 1100. <sup>b</sup>The atomic percentage of the relative N species occupying in the total N content.

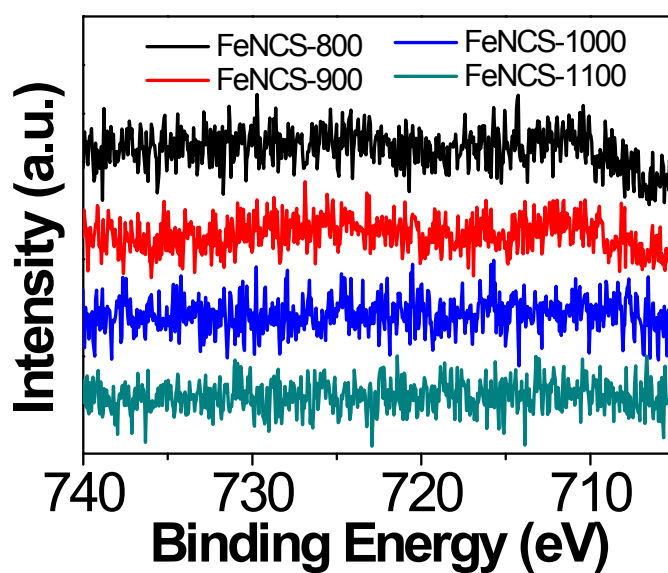

**Fig. S6** High-resolution Fe 2p spectra for FeNCSs. No evident peaks could be found ascribed to low doping content of Fe.

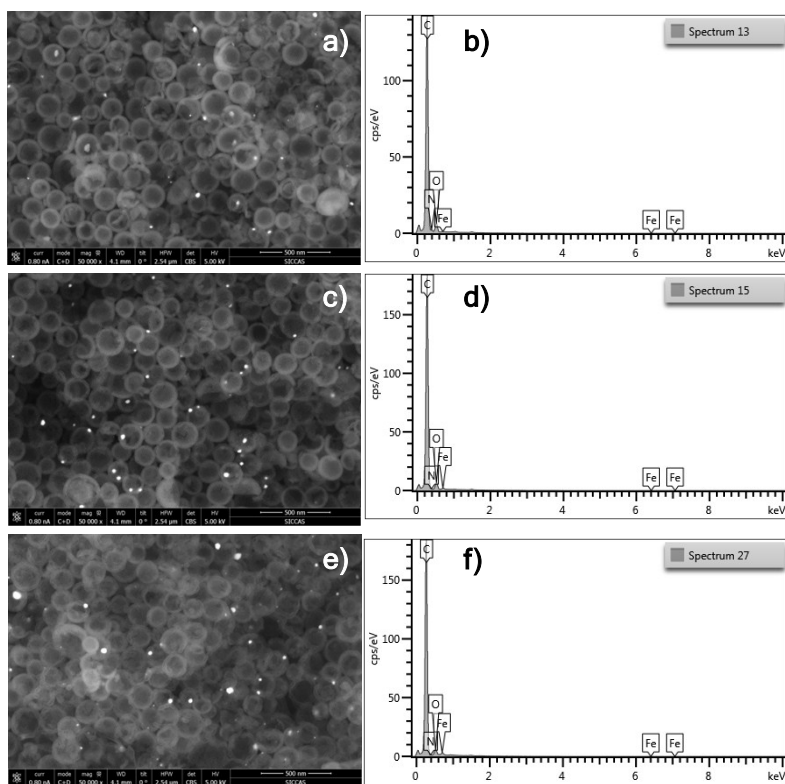

**Fig. S7** STEM images and EDS spectra of FeNCSs prepared with different Fe/C mass ratios in the precursors at 1000 °C. a, b) Fe/C = 1 wt%; c, d) Fe/C = 2 wt%; and e, f) Fe/C = 3 wt%.

**Table S5.** The C, O, and Fe contents of FeNCSs prepared with different Fe/C mass ratios in the precursors at 1000 °C determined by EDS analysis.

| Fe/C mass ratio in the precursor | C (wt%) | O (wt%) | Fe (wt%) |
|----------------------------------|---------|---------|----------|
| 1 wt%                            | 93.71   | 3.86    | 1.23     |
| 2 wt%                            | 94.10   | 2.98    | 2.36     |
| 3 wt%                            | 92.73   | 2.23    | 3.41     |



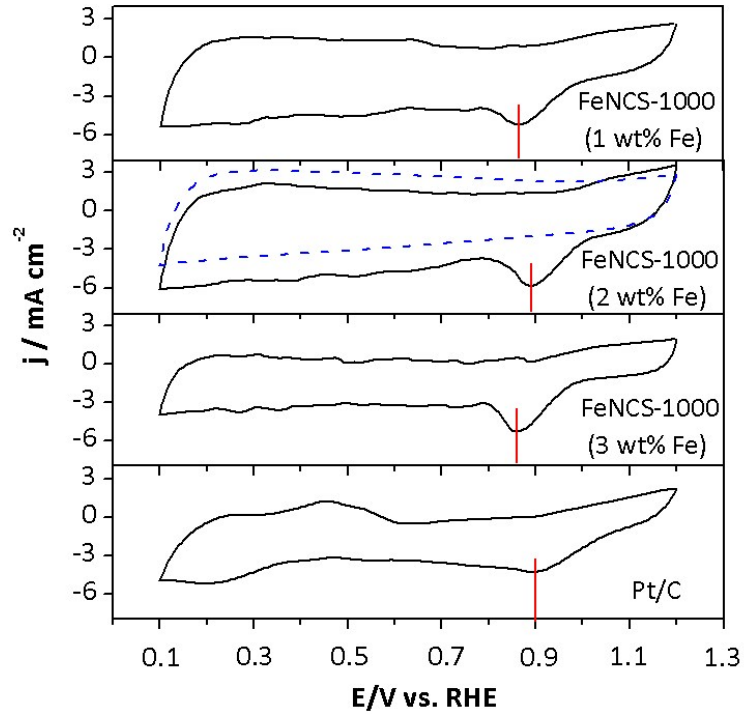

**Fig. S8** Cycle voltammetry (CV) curves of (a) FeNCS-1000 with 1, 2 and 3 wt% Fe and commercial 20 wt% Pt/C catalyst in  $\text{O}_2$ -saturated 0.1 M KOH solution. Blue line in FeNCS-1000 is the CV curve obtained in  $\text{N}_2$ -saturated 0.1 M KOH solution. The cathodic ORR current peak positions for these samples follow the order: Pt/C (0.900 V) > FeNCS-1000 (2 wt% Fe, 0.891 V) > FeNCS-1000 (1 wt% Fe, 0.866 V) > FeNCS-1000 (3 wt% Fe, 0.860 V).

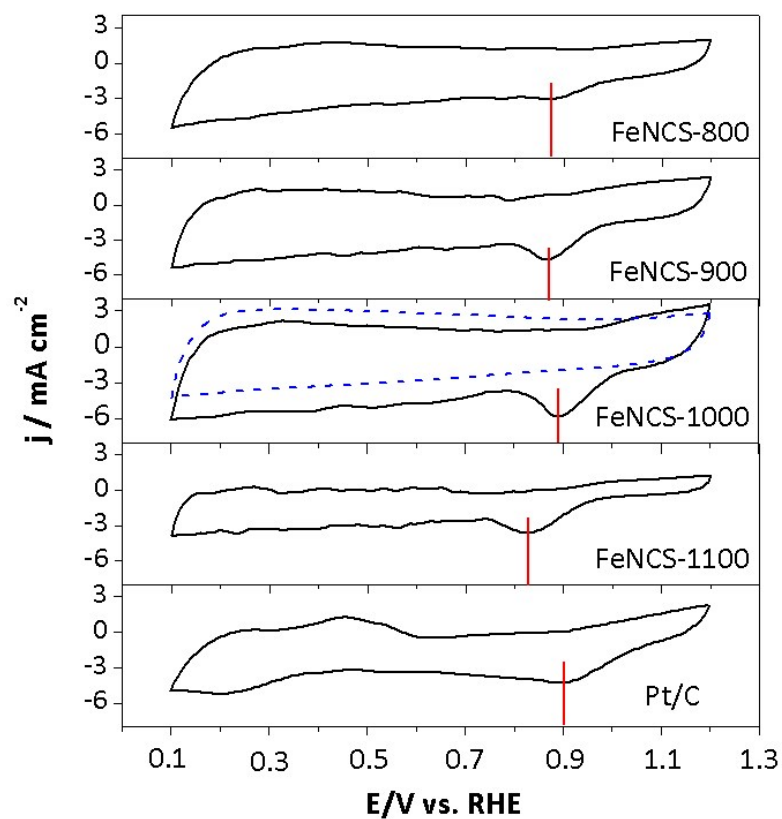

**Fig. S9** Cycle voltammetry (CV) curves of FeNCSs prepared at different pyrolysis temperatures (800-1100 °C) and commercial 20 wt% Pt/C catalyst in O<sub>2</sub>-saturated 0.1 M KOH solution. Blue line in FeNCS-1000 is the CV curve obtained in N<sub>2</sub>-saturated 0.1 M KOH solution. The cathodic ORR current peak positions for these samples follow the order: Pt/C (0.900 V) > FeNCS-1000 (0.891 V) > FeNCS-800 (0.873 V) > FeNCS-900 (0.870 V) > FeNCS-1100 (0.828 V).

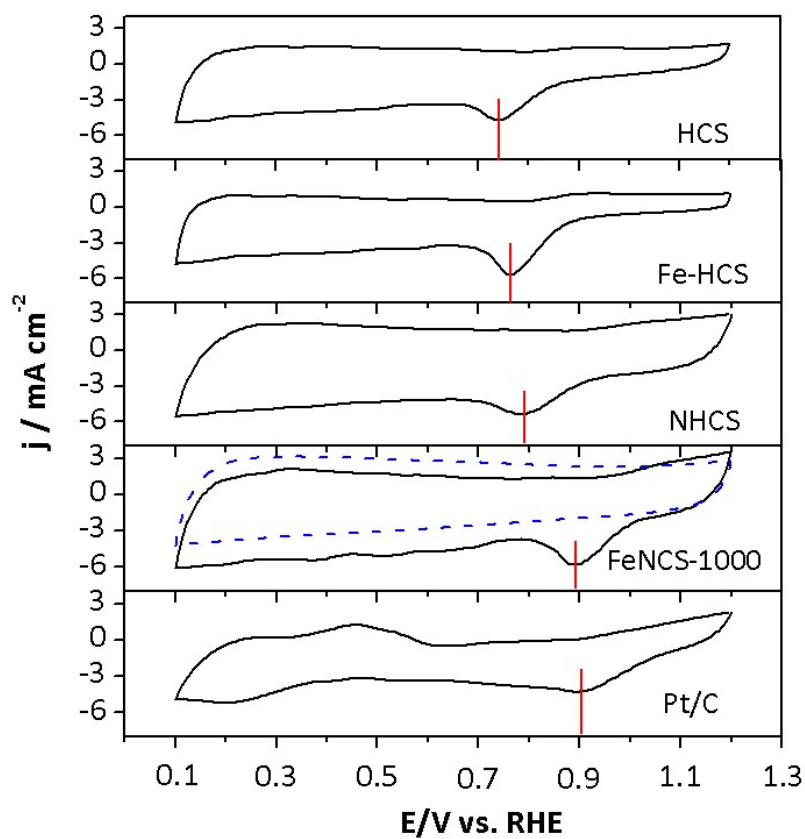

**Fig. S10** Cycle voltammetry (CV) curves of HCS, Fe-HCS, NHCS, FeNCS-1000 and commercial Pt/C catalyst in O<sub>2</sub>-saturated 0.1 M KOH solution. Blue line in FeNCS-1000 is the CV curve measured in N<sub>2</sub> saturated 0.1 M KOH solution. It is evident that the cathodic ORR peak position of FeNCS-1000 is very close to that of Pt/C, which is much more positive than those for HCS, Fe-HCS, and NHCS.

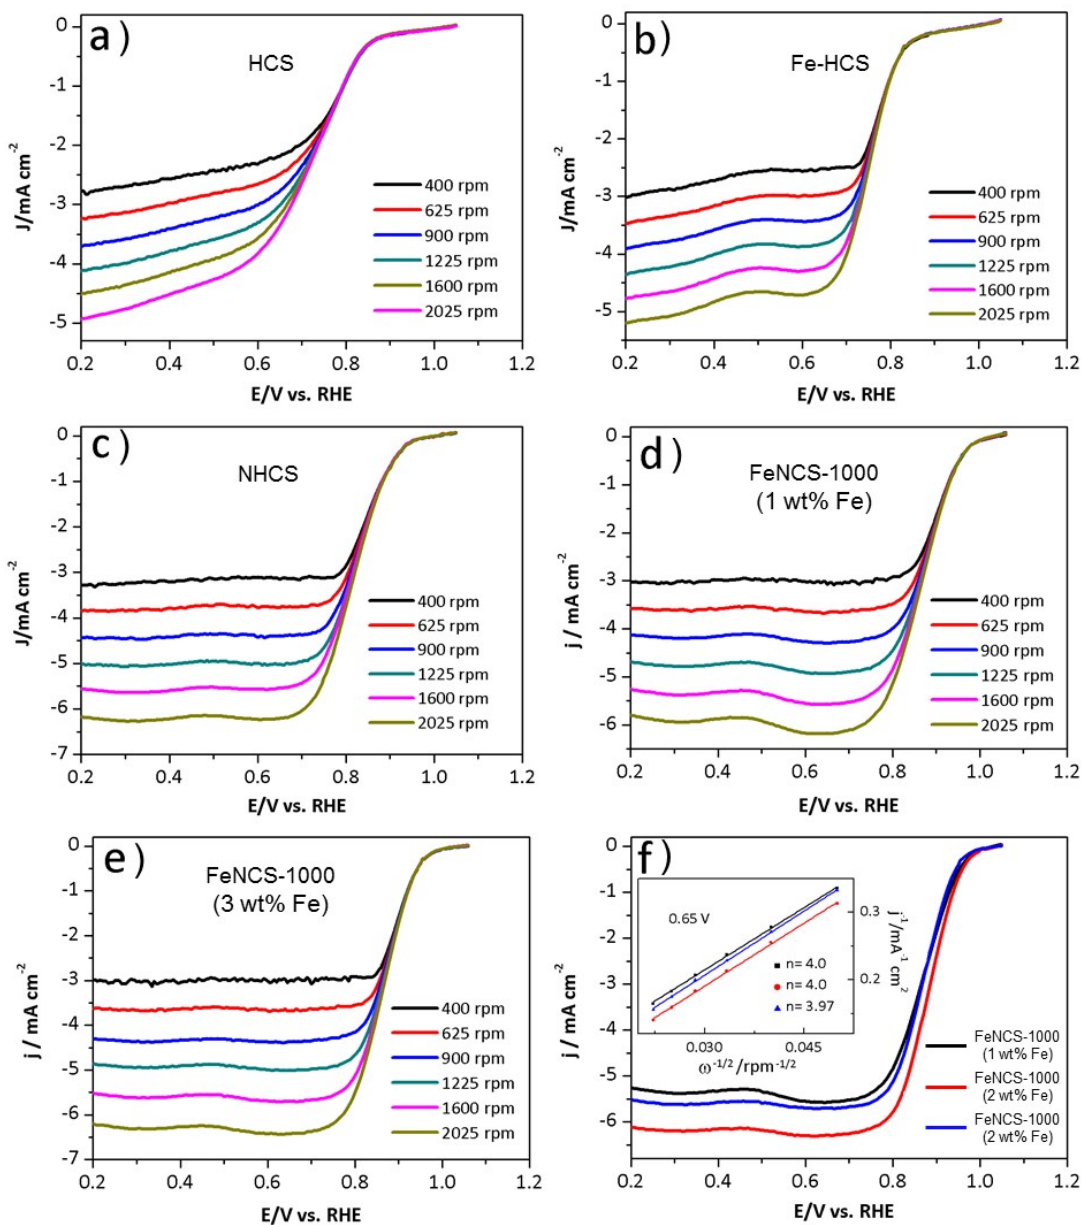

**Fig. S11** RDE curves of a) HCS, b) Fe-HCS, c) NHCS, d) and e) FeNCS-1000 with 1 and 3 wt% Fe at various rotation speeds from 400 to 2025 rpm in  $O_2$  saturated 0.1 M KOH solution (scanning rate:  $10 \text{ mV s}^{-1}$ ), respectively. f) RDE curves of FeNCS-1000 with different Fe content at 1600 rpm in  $O_2$  saturated 0.1 M KOH solution (scanning rate:  $10 \text{ mV s}^{-1}$ ). The inset in f) is the corresponding Koutecky-Levich (K-L) plots of FeNCS-1000 with different Fe content at 0.65 V vs. RHE, respectively.

RDE curves of all samples for ORR at different rotating speeds from 400 to 2025 rpm indicate the increased current density with an increase in rotating speeds because of the improved mass transport on the electrode surface. As shown in Fig. S11f, the RDE curves obtained at 1600 rpm indicate that

FeNCS-1000 prepared with 2 wt% Fe shows the more positive  $E_{1/2}$  value and larger limiting current density than FeNCS-1000 prepared with 1 and 3 wt% Fe, implying the optimum ORR performance for FeNCS-1000 (2 wt%) among these samples.

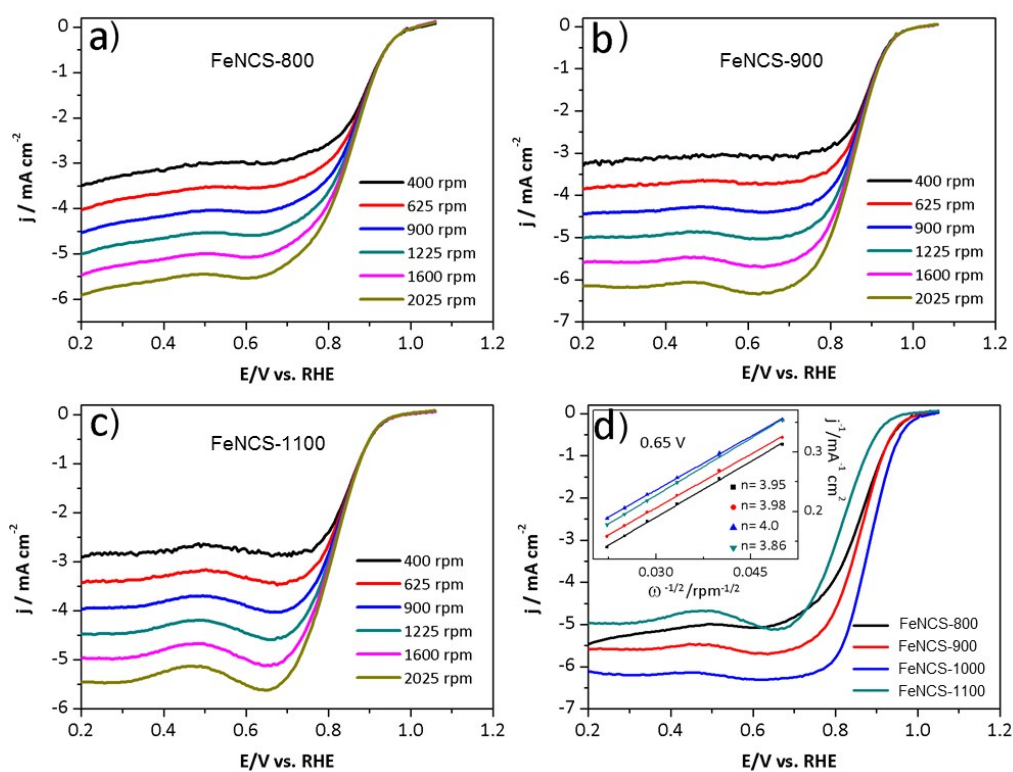

**Fig. S12** RDE curves of a) FeNCS-800, b) FeNCS-900, c) FeNCS-1100 at various rotation speeds from 400 to 2025 rpm in  $O_2$ -saturated 0.1 M KOH solution (scanning rate:  $10 \text{ mV s}^{-1}$ ), respectively. d) RDE curves of the FeNCS-800, FeNCS-900, FeNCS-1000 and FeNCS-1100 at 1600 rpm in  $O_2$  saturated 0.1 M KOH solution (scanning rate:  $10 \text{ mV s}^{-1}$ ). The inset in d) is the corresponding Koutecky-Levich (K-L) plots of the samples at 0.65 V vs. RHE.

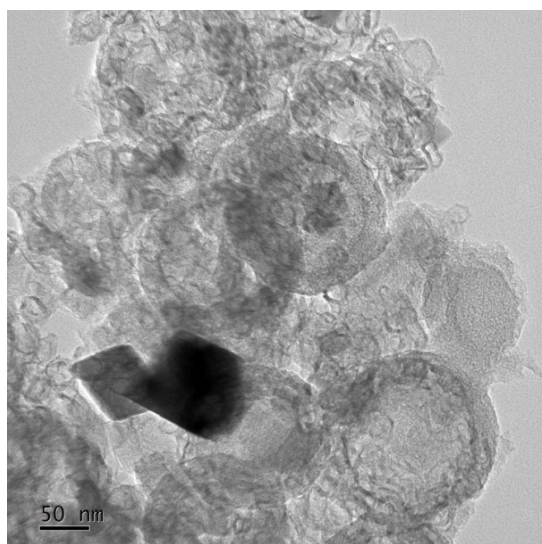

**Fig. S13** TEM images of Fe-HCS. From the image, we can see that Fe-HCS demonstrates highly graphitized feature similar as FeNCS-1000. However, the activity of Fe-HCS is far lower than that of FeNCS-1000, suggesting that N-doping simultaneously plays a crucial role in FeNCS-1000 catalyst with outstanding performance for ORR. Besides, only N-doping can improve the activity for ORR, but it still can not match the high activity for FeNCS-1000 catalyst. Therefore, it can be concluded indirectly that the creation of Fe-N<sub>x</sub> configurations should be main active sites of FeNCS-1000 for ORR.

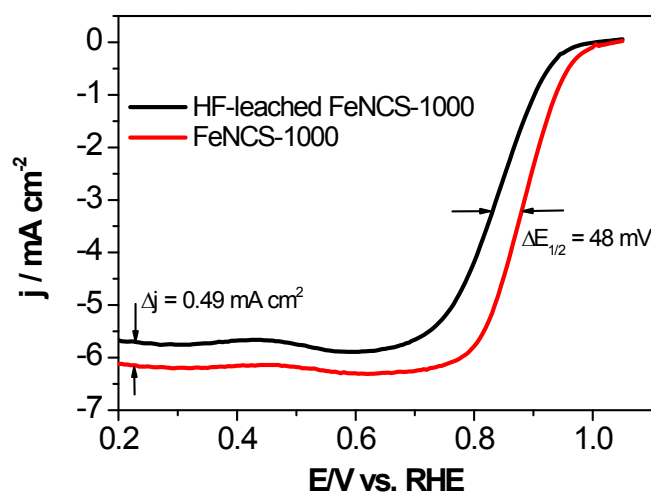

**Fig. S14** Investigating the effects of HF treatment on FeNCS-1000 on the ORR activity in O<sub>2</sub>-saturated 0.1 M KOH solution (rotating speed: 1600 rpm; scanning rate: 10 mV s<sup>-1</sup>). It implies that HF treatment resulted in an evident decrease of the ORR activity in terms of E<sub>1/2</sub> and limiting current density.

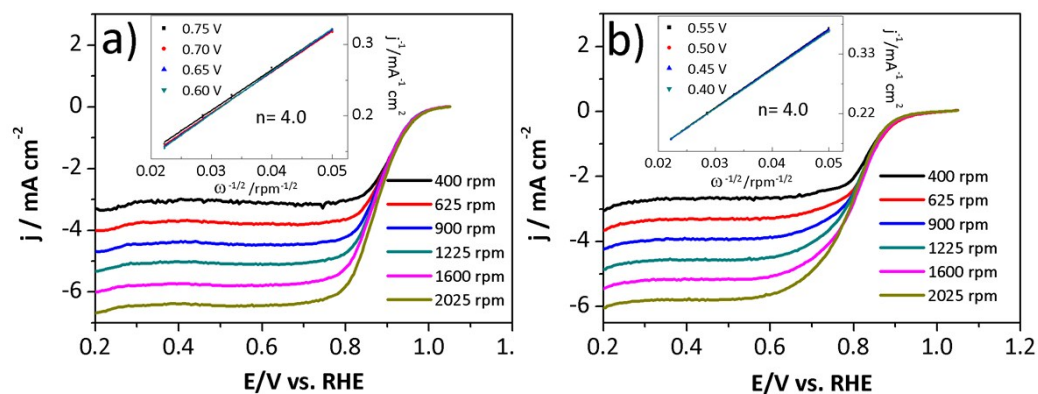

**Fig. S15** RDE curves of 20 wt% Pt/C at various rotation speeds from 400 to 2025 rpm in O<sub>2</sub> saturated a) 0.1 M KOH solution and b) 0.5 M H<sub>2</sub>SO<sub>4</sub> solution (scanning rate: 10 mV s<sup>-1</sup>), respectively. The insets in a) and b) are the corresponding Koutecky-Levich (K-L) plots of Pt/C.

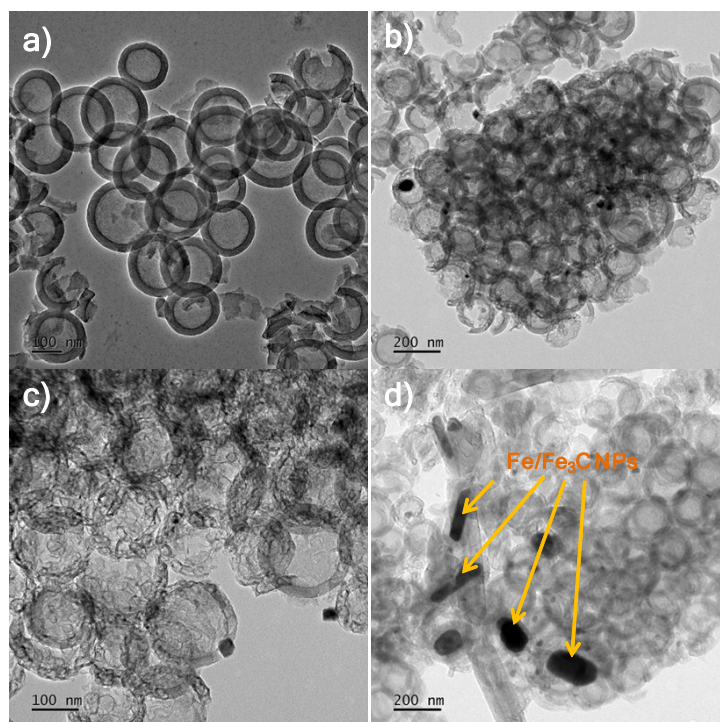

**Fig. S16** TEM images of FeNCS-X prepared at different temperatures, a) 800, b) 900, c) 1000, and d) 1100 °C.

As shown in Fig. S16 a-d, all FeNCS-X samples show typical hollow particles. However, FeNCS-800 has amorphous carbon framework, consistent with the result of XRD analysis. It is evident that

the higher treatment temperature of 900-1100 °C results in the graphitization of mesoporous shells due to the existence of Fe elements within hollow spheres. Very large Fe/Fe<sub>3</sub>C nanoparticles with sizes of nearly 200 nm are found in the 1100 °C-treated sample, due to the destruction of Fe-N<sub>x</sub> moieties and the elimination of heteroatoms (e.g. Fe and N) at high temperature.

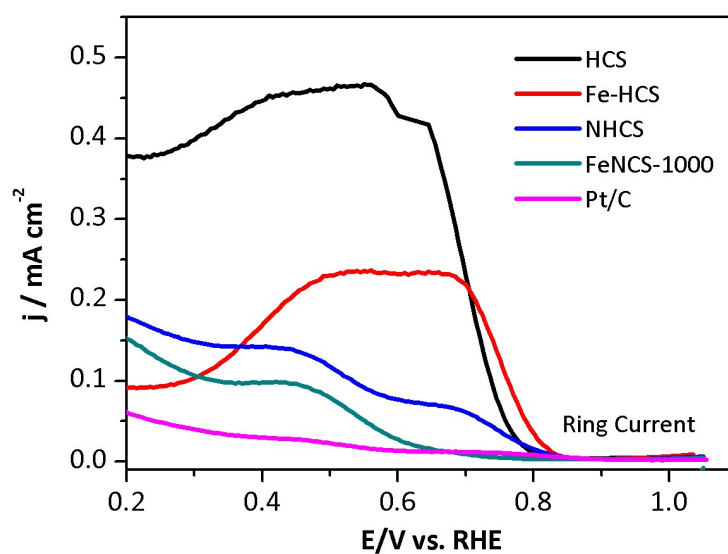

**Fig. S17** Enlargement of the ring currents in Fig. 3d of the main text to highlight the difference.



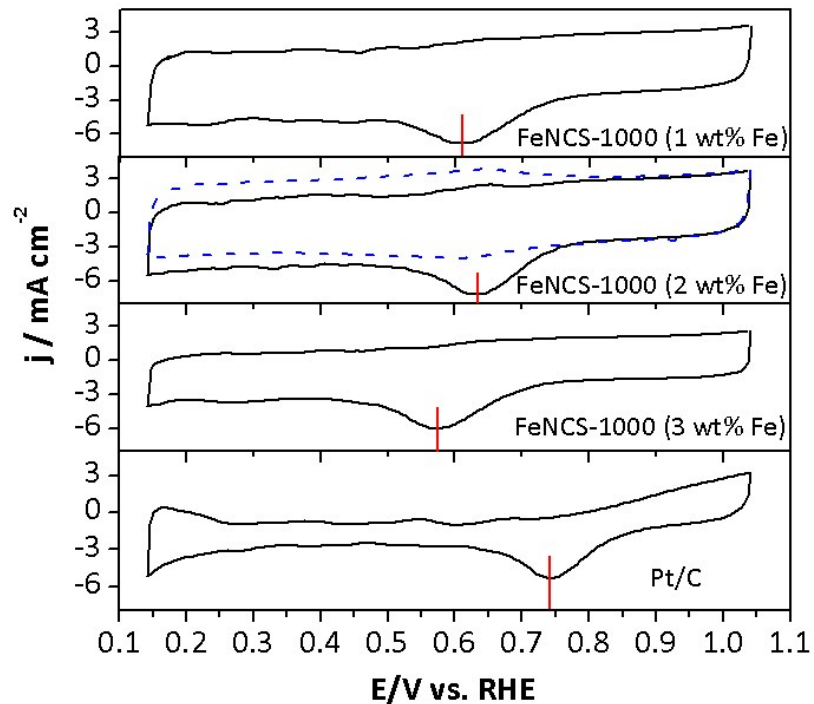

**Fig. S18** Cycle voltammetry (CV) curves of FeNCS-1000 with 1, 2 and 3 wt% Fe and commercial Pt/C catalyst in  $O_2$ -saturated 0.5 M  $H_2SO_4$  solution. Blue line for FeNCS-1000 is the CV curve measured in  $N_2$ -saturated 0.5 M  $H_2SO_4$  solution. A well-defined oxygen reduction peak in CV curve is observed at 0.68 V in  $O_2$ -saturated 0.5 M  $H_2SO_4$  solution, while there is no such a peak in  $N_2$ -saturated one (blue dashed line), suggesting that  $O_2$  was reduced on the electrode coated with FeNCS-1000. The cathodic ORR current peak positions for these samples follow the order: Pt/C (0.738 V) > FeNCS-1000 (2 wt% Fe, 0.634 V) > FeNCS-1000 (1 wt% Fe, 0.609 V) > FeNCS-1000 (3 wt% Fe, 0.572 V).

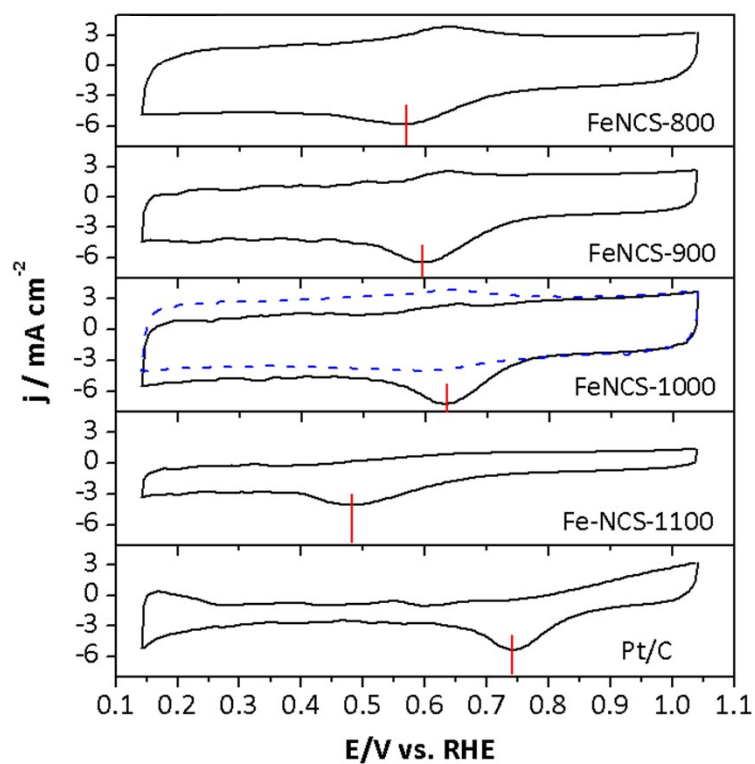

**Fig. S19** Cycle voltammetry (CV) curves of FeNCS-800, 900, 1000, and 1100 and commercial Pt/C catalyst in O<sub>2</sub> saturated 0.5 M H<sub>2</sub>SO<sub>4</sub> solution. Blue line for FeNCS-1000 is the CV curve measured in N<sub>2</sub> saturated 0.5 M H<sub>2</sub>SO<sub>4</sub> solution. The cathodic ORR current peak positions for these samples follow the order: Pt/C (0.738 V) > FeNCS-1000 (0.634 V) > FeNCS-900 (0.597 V) > FeNCS-800 (0.567 V) > FeNCS-1100 (0.477 V).

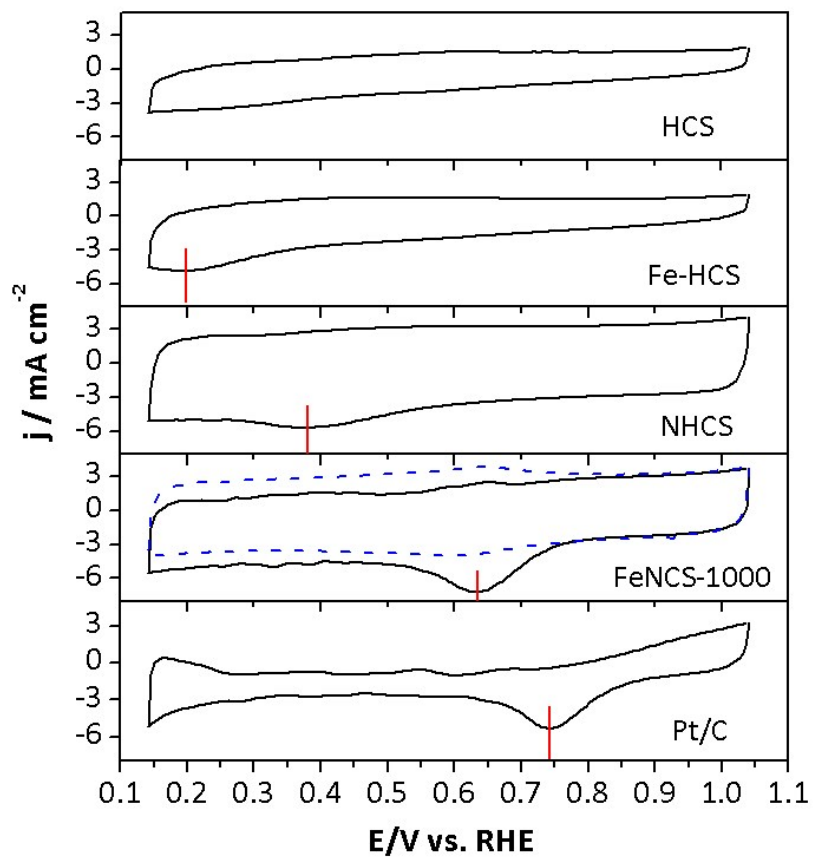

**Fig. S20** Cycle voltammetry (CV) curves of HCS, Fe-HCS, NHCS, FeNCS-1000 and commercial Pt/C catalyst in  $O_2$ -saturated  $0.5\text{ M H}_2\text{SO}_4$  solution. Blue line for FeNCS-1000 is the CV curve measured in  $N_2$  saturated  $0.5\text{ M H}_2\text{SO}_4$  solution.

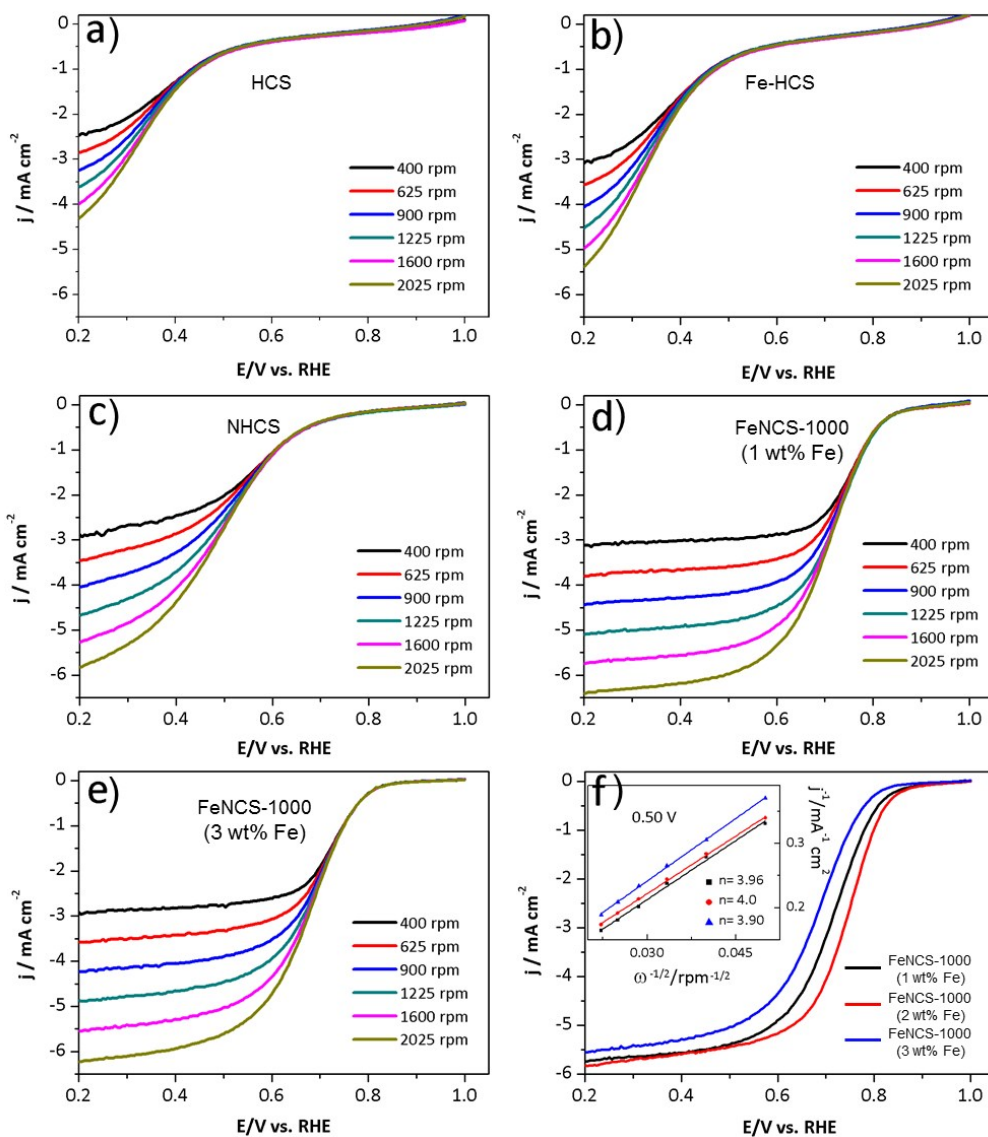

**Fig. S21** RDE curves of the a) HCS, b) Fe-HCS, c) NHCS, d) and e) FeNCS-1000 with 1 and 3 wt% Fe at various rotation speeds from 400 to 2025 rpm in  $\text{O}_2$  saturated 0.5 M  $\text{H}_2\text{SO}_4$  solution (scanning rate:  $10 \text{ mV s}^{-1}$ ), respectively. f) RDE curves of FeNCS-1000 with different Fe content at 1600 rpm in  $\text{O}_2$  saturated 0.5 M  $\text{H}_2\text{SO}_4$  solution (scanning rate:  $10 \text{ mV s}^{-1}$ ). The inset in f) is the corresponding Koutecky-Levich (K-L) plots of the FeNCS-1000 with different Fe content at 0.50 V vs. RHE, respectively.

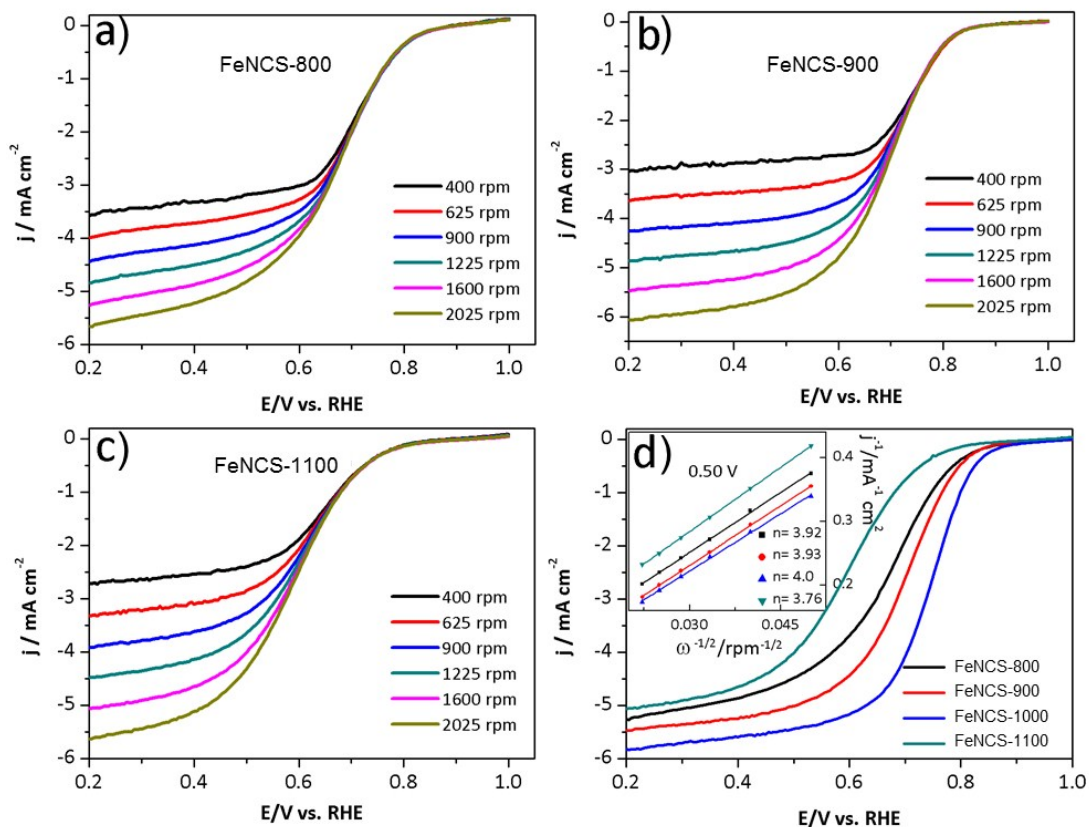

**Fig. S22** RDE curves of a) FeNCS-800, b) FeNCS-900, c) FeNCS-1100 at various rotation speeds from 400 to 2025 rpm in O<sub>2</sub>-saturated 0.5 M H<sub>2</sub>SO<sub>4</sub> solution (scanning rate: 10 mV s<sup>-1</sup>), respectively. d) RDE curves of the FeNCS-800, FeNCS-900, FeNCS-1000 and FeNCS-1100 at 1600 rpm in O<sub>2</sub>-saturated 0.5 M H<sub>2</sub>SO<sub>4</sub> solution (scanning rate: 10 mV s<sup>-1</sup>). The inset in d) is the corresponding Koutecky-Levich (K-L) plots of the samples at 0.50 V vs. RHE.

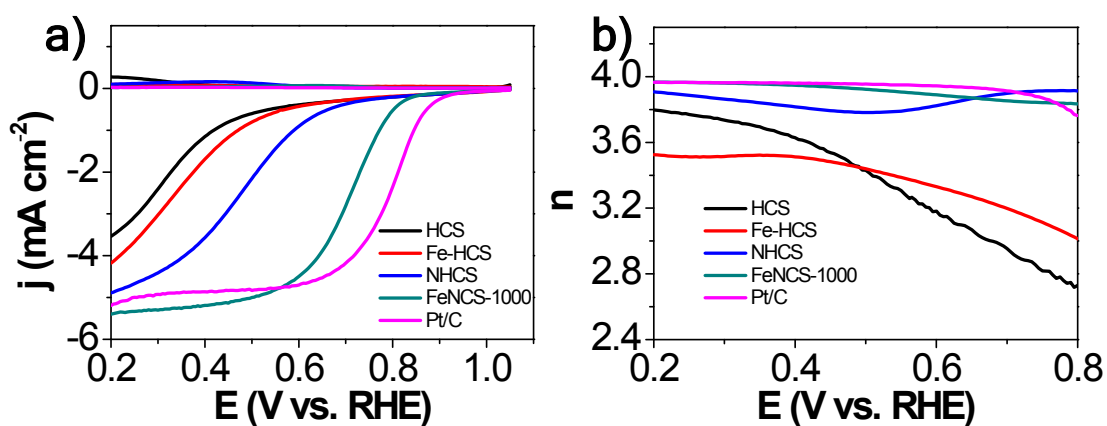

**Fig. S23** RRDE voltammograms (rotating speed: 1600 rpm; scanning rate: 10 mV/s; ring potential: 1.2 V) and the calculated *n* values for HCS, Fe-HCS, NHCS, FeNCS-1000 and Pt/C.

**Table S6.** Comparison of the onset potential ( $E_{\text{onset}}$ ), half-wave potential ( $E_{1/2}$ ), current density at 0.6 V ( $j @0.6 \text{ V}$ ), electron transfer number at 0.6 V ( $n @0.6 \text{ V}$ ) and  $\text{H}_2\text{O}_2$  yield at 0.6 V ( $\text{H}_2\text{O}_2$  yield @0.6 V ) for ORR of non-noble metal catalysts systems from literature reprints and this work in alkaline medium (1600 rpm). The electron transfer number ( $n$ ) was measured by the RRDE test.

| Samples                            | Post-treatment              | Loading ( $\mu\text{g cm}^{-2}$ ) | Electrolyte | $E_{\text{onset}}$ (V. vs RHE) | $E_{1/2}$ (V. vs RHE) | $J @0.6 \text{ V}$ (mA $\text{cm}^{-2}$ ) | $n @0.6 \text{ V}$ | $\text{H}_2\text{O}_2$ yield @0.6 V | Ref.      |
|------------------------------------|-----------------------------|-----------------------------------|-------------|--------------------------------|-----------------------|-------------------------------------------|--------------------|-------------------------------------|-----------|
| FeNCS-1000                         | -                           | 495                               | 0.1 M KOH   | 1.048                          | 0.886                 | 6.30                                      | 3.96               | 2.06                                | This work |
| Fe-N-CC                            | HF                          | 100                               | 0.1 M KOH   | 0.94                           | 0.83                  | 4.03                                      | 3.88               | 5.00                                | 1         |
| Fe-NMCSs                           | -                           | 255                               | 0.1 M KOH   | 1.027                          | 0.86                  | 5.34                                      | 3.99               | 0.84                                | 2         |
| Fe-N/C-700                         | Hot HCl                     | 150                               | 0.1 M KOH   | 0.956                          | 0.840                 | 6.03                                      | 3.96               | 1.76                                | 3         |
| FP-Fe-TA-N-850                     | HCl                         | 300                               | 0.1 M KOH   | 0.98                           | 0.82                  | 5.0                                       | 3.76               | N.M                                 | 4         |
| Fe-N-GC-900                        | HF                          | 200                               | 0.1 M KOH   | 1.01                           | 0.86                  | 5.0                                       | <sup>a</sup> 4.0   | A.M                                 | 5         |
| CoP-CMP800                         | -                           | 600                               | 0.1 M KOH   | 0.88                           | 0.82                  | 4.5                                       | 3.86               | 7.0                                 | 6         |
| meso/micro-Fe-N-CNTs               | Hot HF and HCl              | 400                               | 0.1 M KOH   | 1.01                           | 0.87                  | 5.75                                      | 3.97               | 0.88                                | 7         |
| N-Fe-co-doped CNTs                 | HCl                         | 485                               | 0.1 M KOH   | 1.01                           | 0.875                 | 5.58                                      | 3.95               | 2.48                                | 8         |
| Fe-N-graphene                      | HCl                         | 400                               | 0.1 M KOH   | 1.01                           | 0.801                 | 9.0                                       | 3.98               | 1.23                                | 9         |
| Fe-N/C                             | -                           | 800                               | 0.1 M KOH   | 0.98                           | 0.88                  | 5.9                                       | 3.96               | 2.01                                | 10        |
| $\text{Fe}_3\text{C}/\text{NCNTs}$ | -                           | 1200                              | 0.1 M KOH   | 1.013                          | 0.861                 | 5.73                                      | 3.94               | 3.21                                | 11        |
| Fe-N-CNFs                          | Hot $\text{H}_2\text{SO}_4$ | 600                               | 0.1 M KOH   | 0.945                          | 0.825                 | 5.01                                      | <sup>a</sup> 3.93  | N.M                                 | 12        |
| S-Fe/NGC                           | Hot $\text{H}_2\text{SO}_4$ | 160                               | 0.1 M KOH   | 0.91                           | 0.84                  | 4.5                                       | 3.98               | 0.98                                | 13        |
| FePhen@MOF-ArNH <sub>3</sub>       | -                           | 600                               | 0.1 M KOH   | 1.03                           | 0.86                  | 4.72                                      | N.M                | N.M                                 | 14        |

|                                                |                                    |      |           |       |       |      |                   |      |    |
|------------------------------------------------|------------------------------------|------|-----------|-------|-------|------|-------------------|------|----|
| Fe-N/C-800                                     | HCl                                | 100  | 0.1 M KOH | 0.923 | 0.809 | 5.84 | 3.99              | 0.68 | 15 |
| Fe <sub>3</sub> C@NCNF-900                     | -                                  | 150  | 0.1 M KOH | 0.963 | 0.877 | 4.17 | <sup>a</sup> 3.8  | N.M  | 16 |
| CCOP-P-Fe                                      | HCl                                | 200  | 0.1 M KOH | 0.98  | 0.77  | 3.9  | 3.82              | 9.16 | 17 |
| Fe/Fe <sub>2</sub> O <sub>3</sub> @Fe-N-C-1000 | Hot H <sub>2</sub> SO <sub>4</sub> | 611  | 0.1 M KOH | 0.925 | 0.795 | 6.25 | <sup>a</sup> 4.0  | N.M  | 18 |
| Fe-N/C-800                                     | -                                  | 79.6 | 0.1 M KOH | 0.98  | 0.82  | 4.68 | 3.96              | 2.02 | 19 |
| Co <sub>3</sub> O <sub>4</sub> /N-rGO          | -                                  | 100  | 0.1 M KOH | 0.92  | 0.83  | 5.49 | 3.89              | 5.49 | 20 |
| NC-foam                                        | -                                  | 580  | 0.1 M KOH | 0.95  | 0.80  | 4.0  | 3.62              | 19.0 | 21 |
| Fe@C-FeNC-2                                    | HNO <sub>3</sub>                   | 700  | 0.1 M KOH | 1.016 | 0.899 | 5.08 | 3.96              | 1.30 | 22 |
| Fe/Co-NpGr                                     | Hot H <sub>2</sub> SO <sub>4</sub> | 2500 | 0.1 M KOH | 0.93  | 0.82  | 3.49 | <sup>a</sup> 4.0  | N.M  | 23 |
| (Fe <sub>2</sub> N/MNGCS) <sub>4</sub>         | Hot HCl                            | 400  | 0.1 M KOH | 0.960 | 0.881 | 7.19 | 3.96              | 2.50 | 24 |
| Fe-N-C                                         | -                                  | 500  | 0.1 M KOH | 0.991 | 0.837 | 6.68 | 3.82              | 8.72 | 25 |
| Co-N-mC                                        | -                                  | 283  | 0.1 M KOH | 0.940 | 0.851 | 4.75 | <sup>a</sup> 3.7  | N.M  | 26 |
| Fe <sub>2</sub> S/NGC-900                      | Hot HCl                            | 200  | 0.1 M KOH | 0.95  | 0.83  | 5.18 | 3.99              | 1.22 | 27 |
| 3D Fe-N-C hybrid                               | -                                  | 600  | 0.1 M KOH | 0.970 | 0.869 | 5.10 | 3.96              | 2.08 | 28 |
| CNT/(N-C)-800                                  | HF                                 | 100  | 0.1 M KOH | 0.970 | 0.844 | 5.63 | <sup>a</sup> 4.0  | N.M  | 29 |
| Fe <sub>3</sub> C@N-CNT assemblies             | -                                  | 250  | 0.1 M KOH | 0.97  | 0.85  | 5.62 | <sup>a</sup> 3.96 | N.M  | 30 |
| Co-NC                                          | -                                  | 210  | 0.1 M KOH | 0.95  | 0.83  | 4.4  | <sup>a</sup> 3.67 | N.M  | 31 |
| Fe <sub>3</sub> O <sub>4</sub> /N-GAs          | -                                  | -    | 0.1 M KOH | 0.84  | 0.56  | 1.9  | 3.8               | 10.1 | 32 |
| MnCo <sub>2</sub> O <sub>4</sub> /N-rGO        | HCl                                | 100  | 1 M KOH   | 0.95  | 0.86  | 3.75 | 3.9               | 5.0  | 33 |
| HNCS71                                         | HCl                                | 500  | 0.1 M KOH | 0.97  | 0.82  | 5.9  | 3.95              | 2.54 | 34 |
| MB-CFs                                         | HF                                 | 225  | 0.1 M KOH | 0.99  | 0.81  | 4.8  | <sup>a</sup> 3.95 | N.M  | 35 |

<sup>a</sup>Calculated based on the K-L equation.

**Table S7.** Comparison of the onset potential, half-wave potential, current density at 0.6 V ( $j @0.6$  V vs RHE), electron transfer number at 0.6 V ( $n @0.6$  V vs RHE) and H<sub>2</sub>O<sub>2</sub> yield at 0.6 V (H<sub>2</sub>O<sub>2</sub> yield @0.6 V vs RHE) for ORR of non-noble metal catalysts systems from literature reprints and this work in acid medium (1600 rpm if not otherwise specified). The electron transfer number ( $n$ ) was measured by the RRDE tests.

| Samples              | Post-treatment | Loading ( $\mu\text{g cm}^{-2}$ ) | Electrolyte                          | $E_{\text{onset}}$ vs RHE | $E_{1/2}$ vs RHE | $J @0.6$ V | $n @0.6$ V Vs RHE | H <sub>2</sub> O <sub>2</sub> yield @0.6 V | Ref.      |
|----------------------|----------------|-----------------------------------|--------------------------------------|---------------------------|------------------|------------|-------------------|--------------------------------------------|-----------|
| FeNCS-1000           | -              | 495                               | 0.5 M H <sub>2</sub> SO <sub>4</sub> | 0.910                     | 0.750            | 5.17       | 3.89              | 5.54                                       | This work |
| Fe-N-CC              | HF             | 100                               | 0.5 M H <sub>2</sub> SO <sub>4</sub> | 0.80                      | 0.52             | 1.30       | 3.83              | 8.12                                       | 1         |
| Fe-NMCSs             | -              | 255                               | 0.1 M HClO <sub>4</sub>              | 0.849                     | 0.750            | 4.86       | 3.87              | 6.25                                       | 2         |
| Fe-N/C-700           | Hot HCl        | 150                               | 0.1 M HClO <sub>4</sub>              | 0.830                     | 0.661            | 4.17       | 3.97              | 1.72                                       | 3         |
| FP-Fe-TA-N-850       | HF             | 300                               | 0.1 M HClO <sub>4</sub>              | 0.83                      | 0.58             | 2.6        | <sup>a</sup> 3.2  | N.M                                        | 4         |
| Fe-N-GC-900          | HF             | 600                               | 0.1 M HClO <sub>4</sub>              | 0.87                      | 0.74             | 5.3        | 3.90              | 5.1                                        | 5         |
| Co-N-C               | -              | 600                               | 0.5 M H <sub>2</sub> SO <sub>4</sub> | 0.74                      | 0.64             | 3.5        | 3.93              | 3.50                                       | 6         |
| meso/micro-Fe-N-CNTs | Hot HF and HCl | 400                               | 0.1 M HClO <sub>4</sub>              | 0.89                      | 0.75             | 5.06       | 3.86              | 6.98                                       | 7         |
| N-Fe-co-doped CNTs   | HCl            | 485                               | 0.1 M HClO <sub>4</sub>              | 0.89                      | 0.76             | 5.5        | 3.94              | 3.18                                       | 8         |
| Fe-N-graphene        | HCl            | 400                               | 0.1 M                                | 0.91                      | 0.73             | 9.0        | 3.98              | 1.25                                       | 9         |



|                                           |                                       |      |                                         |       |       |      |       |       |    |
|-------------------------------------------|---------------------------------------|------|-----------------------------------------|-------|-------|------|-------|-------|----|
|                                           |                                       |      | HClO <sub>4</sub>                       |       |       |      |       |       |    |
| Fe-N-C                                    | -                                     | 800  | 0.1 M<br>HClO <sub>4</sub>              | 0.92  | 0.79  | 5.2  | 3.85  | 7.50  | 10 |
| Fe <sub>3</sub> C/NCNTs                   | -                                     | 1200 | 0.5 M<br>H <sub>2</sub> SO <sub>4</sub> | 0.886 | 0.608 | 3.50 | 3.90  | 4.07  | 11 |
| Fe-N-CNFs                                 | Hot<br>H <sub>2</sub> SO <sub>4</sub> | 600  | 0.5 M<br>H <sub>2</sub> SO <sub>4</sub> | 0.748 | 0.563 | 1.75 | *3.70 | N.M   | 12 |
| S-Fe/NGC                                  | Hot<br>H <sub>2</sub> SO <sub>4</sub> | 160  | 0.1 M<br>HClO <sub>4</sub>              | 0.83  | 0.66  | 2.9  | 3.94  | 2.50  | 13 |
| FePhen@MOF-ArNH <sub>3</sub>              | -                                     | 600  | 0.1 M<br>HClO <sub>4</sub>              | 0.93  | 0.77  | 5.09 | 3.99  | 0.28  | 14 |
| Fe-N/C-800                                | HCl                                   | 100  | 0.1 M<br>HClO <sub>4</sub>              | 0.788 | 0.592 | 2.96 | 3.97  | 1.50  | 15 |
| Fe <sub>3</sub> C@NCNF-900                | -                                     | 150  | 0.1 M<br>HClO <sub>4</sub>              | 0.832 | 0.642 | 2.84 | N.M   | N.M   | 16 |
| CCOP-P-Fe                                 | -                                     | 200  | 0.1 M<br>HClO <sub>4</sub>              | 0.89  | 0.58  | 1.75 | 3.6   | 20.0  | 17 |
| Fe/Fe <sub>2</sub> O <sub>3</sub> @Fe-N-C | Hot<br>H <sub>2</sub> SO <sub>4</sub> | 611  | 0.1 M<br>HClO <sub>4</sub>              | 0.718 | 0.558 | 1.90 | N.M   | N.M   | 18 |
| Fe-N-rGO                                  | Hot<br>H <sub>2</sub> SO <sub>4</sub> | 400  | 0.5 M<br>H <sub>2</sub> SO <sub>4</sub> | 0.818 | 0.617 | 2.25 | 3.70  | 7.74  | 36 |
| FeNP-C                                    | Hot<br>H <sub>2</sub> SO <sub>4</sub> | 600  | 0.5 M<br>H <sub>2</sub> SO <sub>4</sub> | 0.87  | 0.72  | 4.3  | N.M   | N.M   | 37 |
| Co-N-GA                                   | Hot<br>H <sub>2</sub> SO <sub>4</sub> | 611  | 0.5 M<br>H <sub>2</sub> SO <sub>4</sub> | 0.87  | 0.73  | 5.13 | 3.76  | 12.09 | 38 |
| Fe-N/CNN3                                 | Hot HCl                               | 500  | 0.5 M<br>H <sub>2</sub> SO <sub>4</sub> | 0.83  | 0.58  | 1.48 | N.M   | N.M   | 39 |
| 10% Fe-N-C (750 °C)                       | HCl                                   | 612  | 0.1 M<br>HClO <sub>4</sub>              | 0.87  | 0.75  | 3.90 | 3.92  | 4.0   | 40 |

|                                       |                                       |      |                                         |       |       |      |                  |      |    |
|---------------------------------------|---------------------------------------|------|-----------------------------------------|-------|-------|------|------------------|------|----|
| Fe-N-C-700                            | -                                     | 385  | 0.5 M<br>H <sub>2</sub> SO <sub>4</sub> | 0.828 | 0.656 | 2.28 | 3.97             | 1.56 | 41 |
| Co-Mo-N                               | -                                     | 97   | 0.5 M<br>H <sub>2</sub> SO <sub>4</sub> | 0.810 | 0.569 | 1.50 | 3.68             | 16.0 | 42 |
| Fe-N-C/CNTs<br>(400 rpm)              | -                                     | 1200 | 0.1 M<br>HClO <sub>4</sub>              | 0.83  | 0.67  | 1.86 | N.M              | N.M  | 43 |
| PpPD-Fe-C                             | Hot<br>H <sub>2</sub> SO <sub>4</sub> | 900  | 0.5 M<br>H <sub>2</sub> SO <sub>4</sub> | 0.826 | 0.718 | 2.90 | <sup>a</sup> 3.8 | N.M  | 44 |
| Fe <sub>3</sub> O <sub>4</sub> /N-GAs | -                                     | -    | 0.5 M<br>H <sub>2</sub> SO <sub>4</sub> | 0.75  | 0.34  | N.M  | 3.95             | 2.4  | 32 |
| Fe-AAPyr                              | HF                                    | 600  | 0.5 M<br>H <sub>2</sub> SO <sub>4</sub> | 0.90  | 0.75  | 5.17 | 3.94             | 3.03 | 45 |
| Fe <sub>3</sub> C/C-700<br>(900 rpm)  | -                                     | 600  | 0.5 M<br>H <sub>2</sub> SO <sub>4</sub> | 0.90  | 0.73  | 3.58 | 3.87             | 6.63 | 46 |

<sup>a</sup>Calculated based on the K-L equation.

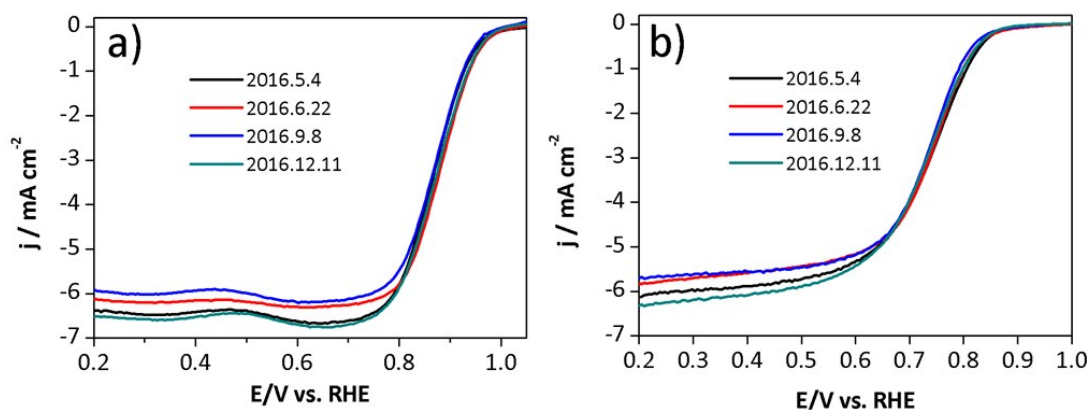

**Fig. 24** LSV curves of four FeNCS-1000 samples synthesized at different dates from 2016.5.5 to 2016.12.11 in O<sub>2</sub>-saturated a) 0.1 M KOH solution, b) 0.5 M H<sub>2</sub>SO<sub>4</sub> solution (rotating speed: 1600 rpm; scanning rate: 10 mV s<sup>-1</sup>), respectively. The FeNCS-1000 synthesized at 2016.6.22 (red lines) was used and compared in this article.

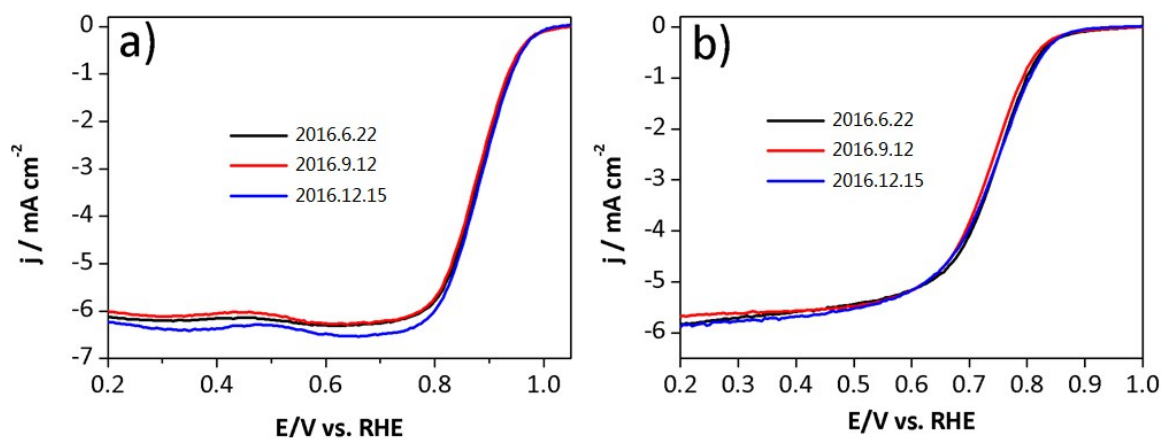

**Fig. 25** LSV tests for FeNCS-1000 (synthesized at 2016.6.22) performed at different dates (2014.6.22, 2016.9.12, and 2016.12.15) in O<sub>2</sub>-saturated a) 0.1 M KOH solution, b) 0.5 M H<sub>2</sub>SO<sub>4</sub> solution (rotating speed: 1600 rpm; scanning rate: 10 mV s<sup>-1</sup>), respectively. The LSV curves tested at 2016.6.22 (black lines) were used and compared in this article.

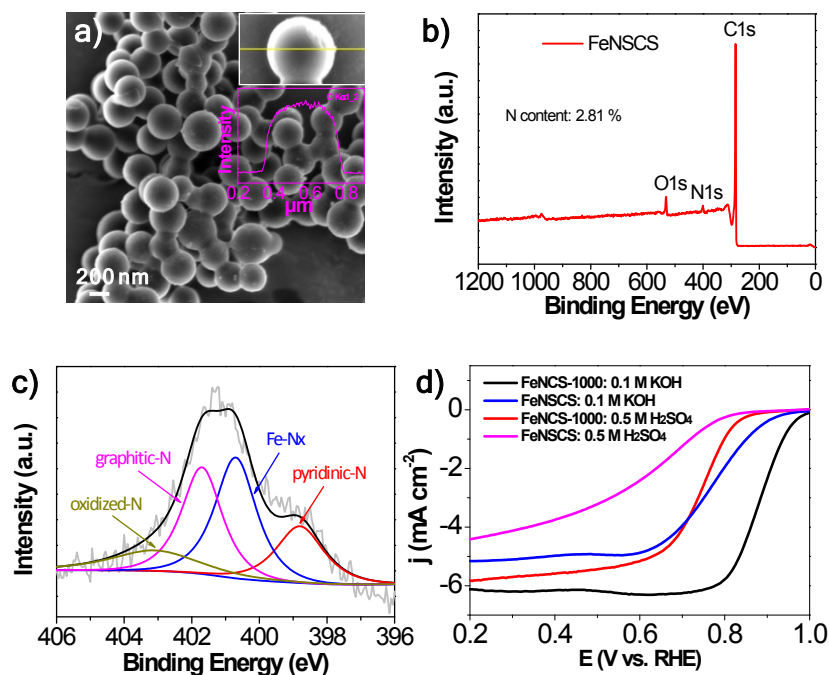

**Fig. 26** a) SEM image (inset: a single FeNSCS sphere with a solid core proved by corresponding cross-sectional line scan for carbon element), b) XPS survey for FeNSCS, c) high-resolution N 1s XPS spectrum for FeNSCS, and d) comparison of RDE voltammograms for FeNSCS and FeNCS-1000 collected in 0.1 M KOH and 0.5 M H<sub>2</sub>SO<sub>4</sub> (rotating speed: 1600 rpm; scanning rate: 10 mV s<sup>-1</sup>), respectively.

**Table S8.** Comparison for N and Fe-N<sub>x</sub> content of FeNSCS and FeNCS-1000.

| Samples    | N content (%) | pyridinic-N | graphitic-N | Fe-N <sub>x</sub> | Oxidized-N |
|------------|---------------|-------------|-------------|-------------------|------------|
| FeNSCS     | 2.8           | 19.56       | 31.23       | 36.37             | 12.54      |
| FeNCS-1000 | 2.5           | 23.41       | 28.86       | 38.85             | 8.88       |

**Table S9.** Comparison for ORR activity in terms of the onset potential ( $E_{\text{onset}}$ ), half-wave potential ( $E_{1/2}$ ), current density at 0.6 V ( $j @0.6 \text{ V}$ ) of FeNCS@ and FeNCS-1000.

| Samples    | $E_{\text{onset}}$<br>(V vs RHE) |                                  | $E_{1/2}$<br>(V vs RHE) |                                  | $J @0.6 \text{ V}$<br>vs RHE ( $\text{mA cm}^{-2}$ ) |                                  |
|------------|----------------------------------|----------------------------------|-------------------------|----------------------------------|------------------------------------------------------|----------------------------------|
|            | 0.1 M<br>KOH                     | 0.5 M<br>$\text{H}_2\text{SO}_4$ | 0.1 M<br>KOH            | 0.5 M<br>$\text{H}_2\text{SO}_4$ | 0.1 M<br>KOH                                         | 0.5 M<br>$\text{H}_2\text{SO}_4$ |
| FeNCS      | 0.972                            | 0.870                            | 0.770                   | 0.617                            | 4.87                                                 | 2.41                             |
| FeNCS-1000 | 1.048                            | 0.910                            | 0.886                   | 0.760                            | 6.30                                                 | 5.17                             |

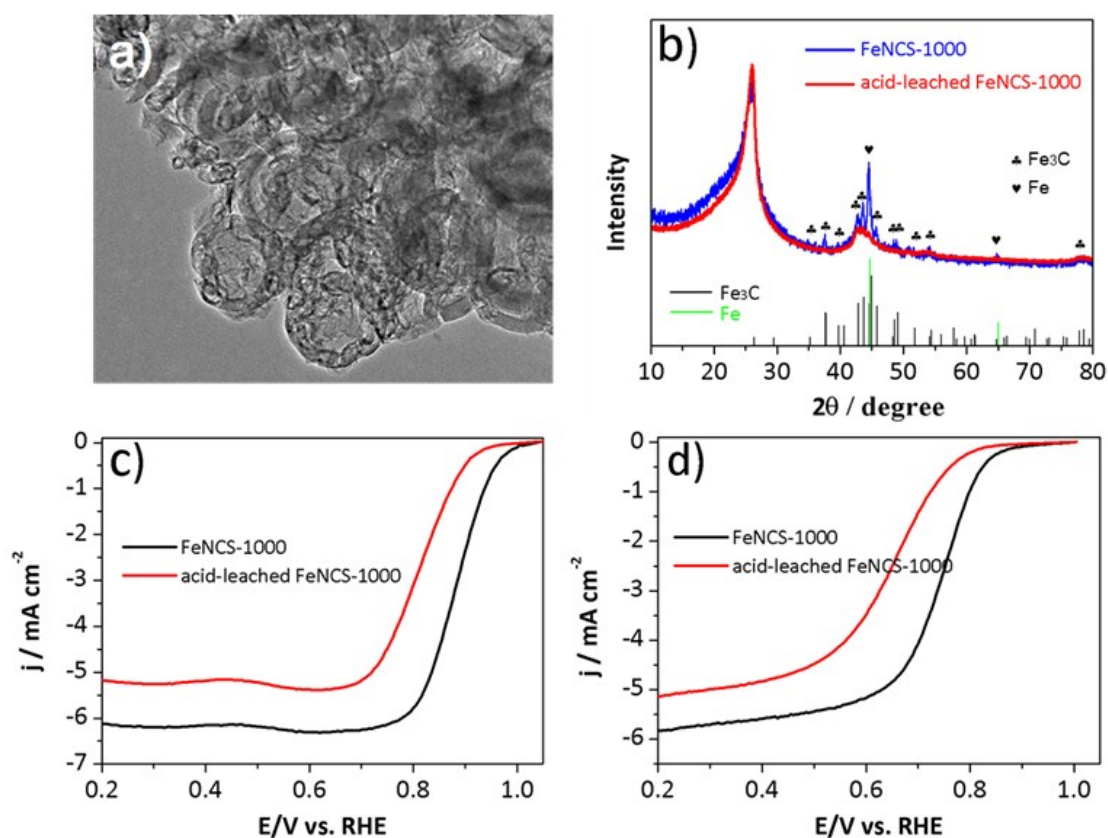

**Fig. S27** a) TEM image of FeNCS-1000 after acid-leached treatment with 0.5 M hot  $\text{H}_2\text{SO}_4$  solution (acid-leached FeNCS-1000), b) XRD patterns of FeNCS-1000 and acid-leached FeNCS-1000, c) and d) LSV curves of FeNCS-1000 and acid-leached FeNCS-1000 at 1600 rpm in  $\text{O}_2$  saturated 0.1 M KOH and 0.5 M  $\text{H}_2\text{SO}_4$  solution (scanning rate:  $10 \text{ mV s}^{-1}$ ), respectively.

To demonstrate the effect of the Fe/Fe<sub>3</sub>C nanocrystals on the ORR activity, the FeNCS-1000 was leached in 0.5 M H<sub>2</sub>SO<sub>4</sub> at 60 °C for 12 h to remove the Fe/Fe<sub>3</sub>C nanocrystals, which was denoted as acid-leached FeNCS-1000. TEM image and the XRD patterns indicate the removal of Fe<sub>3</sub>C/Fe nanoparticles in FeNCS-1000 by acid-leaching treatment. It shows that acid-leached FeNCS-1000 has inferior ORR activity to original FeNCS-1000.

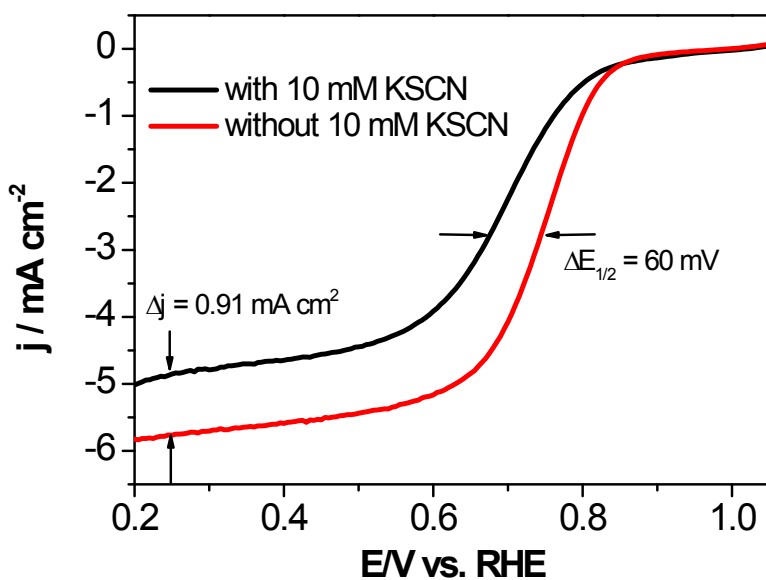

**Fig. S28** RDE curves of FeNCS-1000 measured in O<sub>2</sub>-saturated 0.5 M H<sub>2</sub>SO<sub>4</sub> solution with or without 10 mM KSCN.

## References for Electronic Supplementary Information:

1. G. A. Ferrero, K. Preuss, A. Marinovic, A. B. Jorge, N. Mansor, D. J. L. Brett, A. B. Fuertes, M. Sevilla and M.-M. Titirici, *ACS Nano*, 2016, **10**, 5922-5932.
2. F. L. Meng, Z. L. Wang, H. X. Zhong, J. Wang, J. M. Yan and X. B. Zhang, *Advanced materials*, 2016, **28**, 7948-7955.
3. Z. K. Yang, L. Lin and A. W. Xu, *Small*, 2016, **12**, 5710-5719.
4. J. Wei, Y. Liang, Y. Hu, B. Kong, G. P. Simon, J. Zhang, S. P. Jiang and H. Wang, *Angewandte Chemie*, 2016, **55**, 1355-1359.
5. A. Kong, X. Zhu, Z. Han, Y. Yu, Y. Zhang, B. Dong and Y. Shan, *ACS Catalysis*, 2014, **4**, 1793-1800.
6. Z.-S. Wu, L. Chen, J. Liu, K. Parvez, H. Liang, J. Shu, H. Sachdev, R. Graf, X. Feng and K. Müllen, *Advanced materials*, 2014, **26**, 1450-1455.
7. J.-C. Li, P.-X. Hou, C. Shi, S.-Y. Zhao, D.-M. Tang, M. Cheng, C. Liu and H.-M. Cheng, *Carbon*, 2016, **109**, 632-639.
8. Y. Li, W. Zhou, H. Wang, L. Xie, Y. Liang, F. Wei, J. C. Idrobo, S. J. Pennycook and H. Dai, *Nature nanotechnology*, 2012, **7**, 394-400.
9. C. He, J. J. Zhang and P. K. Shen, *Journal of Materials Chemistry A*, 2014, **2**, 3231.
10. Y. J. Sa, D. J. Seo, J. Woo, J. T. Lim, J. Y. Cheon, S. Y. Yang, J. M. Lee, D. Kang, T. J. Shin, H. S. Shin, H. Y. Jeong, C. S. Kim, M. G. Kim, T. Y. Kim and S. H. Joo, *Journal of the American Chemical Society*, 2016, DOI: 10.1021/jacs.6b09470.
11. W. Yang, X. Liu, X. Yue, J. Jia and S. Guo, *Journal of the American Chemical Society*, 2015, **137**, 1436-1439.
12. Z.-Y. Wu, X.-X. Xu, B.-C. Hu, H.-W. Liang, Y. Lin, L.-F. Chen and S.-H. Yu, *Angewandte Chemie International Edition*, 2015, **54**, 8179-8183.
13. K. Hu, L. Tao, D. Liu, J. Huo and S. Wang, *ACS applied materials & interfaces*, 2016, **8**, 19379-19385.
14. K. Strickland, E. Miner, Q. Jia, U. Tylus, N. Ramaswamy, W. Liang, M. T. Sougrati, F. Jaouen and S. Mukerjee, *Nat Commun*, 2015, **6**, 7343.
15. L. Lin, Q. Zhu and A. W. Xu, *Journal of the American Chemical Society*, 2014, **136**, 11027-11033.

16. G. Ren, X. Lu, Y. Li, Y. Zhu, L. Dai and L. Jiang, *ACS applied materials & interfaces*, 2016, **8**, 4118-4125.
17. Z. Xiang, Y. Xue, D. Cao, L. Huang, J.-F. Chen and L. Dai, *Angewandte Chemie International Edition*, 2014, **53**, 2433-2437.
18. Y. Zang, H. Zhang, X. Zhang, R. Liu, S. Liu, G. Wang, Y. Zhang and H. Zhao, *Nano Research*, 2016, **9**, 2123-2137.
19. W. Niu, L. Li, X. Liu, N. Wang, J. Liu, W. Zhou, Z. Tang and S. Chen, *Journal of the American Chemical Society*, 2015, **137**, 5555-5562.
20. Y. Liang, Y. Li, H. Wang, J. Zhou, J. Wang, T. Regier and H. Dai, *Nature materials*, 2011, **10**, 780-786.
21. J. Liu, B. V. Cunnig, T. Daio, A. Mufundirwa, K. Sasaki and S. M. Lyth, *Electrochimica Acta*, 2016, **220**, 554-561.
22. W. J. Jiang, L. Gu, L. Li, Y. Zhang, X. Zhang, L. J. Zhang, J. Q. Wang, J. S. Hu, Z. Wei and L. J. Wan, *Journal of the American Chemical Society*, 2016, **138**, 3570-3578.
23. T. Palaniselvam, V. Kashyap, S. N. Bhange, J.-B. Baek and S. Kurungot, *Advanced Functional Materials*, 2016, **26**, 2150-2162.
24. J. Xiao, Y. Xu, Y. Xia, J. Xi and S. Wang, *Nano Energy*, 2016, **24**, 121-129.
25. X. Cui, S. Yang, X. Yan, J. Leng, S. Shuang, P. M. Ajayan and Z. Zhang, *Advanced Functional Materials*, 2016, **26**, 5708-5717.
26. F. Hu, H. Yang, C. Wang, Y. Zhang, H. Lu and Q. Wang, *Small*, 2016, DOI: 10.1002/smll.201602507.
27. B. Men, Y. Sun, J. Liu, Y. Tang, Y. Chen, P. Wan and J. Pan, *ACS applied materials & interfaces*, 2016, **8**, 19533-19541.
28. Y. Zhang, L.-B. Huang, W.-J. Jiang, X. Zhang, Y.-Y. Chen, Z. Wei, L.-J. Wan and J.-S. Hu, *J. Mater. Chem. A*, 2016, **4**, 7781-7787.
29. J. C. Li, S. Y. Zhao, P. X. Hou, R. P. Fang, C. Liu, J. Liang, J. Luan, X. Y. Shan and H. M. Cheng, *Nanoscale*, 2015, **7**, 19201-19206.
30. B. Y. Guan, L. Yu and X. W. Lou, *Energy Environ. Sci.*, 2016, **9**, 3092-3096.
31. A. Aijaz, J. Masa, C. Rosler, W. Xia, P. Weide, A. J. Botz, R. A. Fischer, W. Schuhmann and M. Muhler, *Angewandte Chemie*, 2016, **55**, 4087-4091.



32. Z. S. Wu, S. Yang, Y. Sun, K. Parvez, X. Feng and K. Mullen, *Journal of the American Chemical Society*, 2012, **134**, 9082-9085.
33. Y. Liang, H. Wang, J. Zhou, Y. Li, J. Wang, T. Regier and H. Dai, *Journal of the American Chemical Society*, 2012, **134**, 3517-3523.
34. J. Sanetuntikul, T. Hang and S. Shanmugam, *Chem. Commun*, 2014, **50**, 9473-9476.
35. C. Liu, J. Wang, J. Li, R. Luo, X. Sun, J. Shen, W. Han and L. Wang, *Carbon*, 2017, **114**, 706-716.
36. H. R. Byon, J. Suntivich and Y. Shao-Horn, *Chemistry of Materials*, 2011, **23**, 3421-3428.
37. Y. Hu, J. Zhu, Q. Lv, C. Liu, Q. Li and W. Xing, *Electrochimica Acta*, 2015, **155**, 335-340.
38. X. Fu, J. Y. Choi, P. Zamani, G. Jiang, M. A. Hoque, F. M. Hassan and Z. Chen, *ACS applied materials & interfaces*, 2016, **8**, 6488-6495.
39. E. Negro, A. H. A. M. Videla, V. Baglio, A. S. Aricò, S. Specchia and G. J. M. Koper, *Applied Catalysis B: Environmental*, 2015, **166-167**, 75-83.
40. M.-Q. Wang, W.-H. Yang, H.-H. Wang, C. Chen, Z.-Y. Zhou and S.-G. Sun, *ACS Catalysis*, 2014, **4**, 3928-3936.
41. H. Xiao, Z.-G. Shao, G. Zhang, Y. Gao, W. Lu and B. Yi, *Carbon*, 2013, **57**, 443-451.
42. T. Sun, Q. Wu, R. Che, Y. Bu, Y. Jiang, Y. Li, L. Yang, X. Wang and Z. Hu, *ACS Catalysis*, 2015, **5**, 1857-1862.
43. B. Merzougui, A. Hachimi, A. Akinpelu, S. Bukola and M. Shao, *Electrochimica Acta*, 2013, **107**, 126-132.
44. Y. Zhu, B. Zhang, X. Liu, D. W. Wang and D. S. Su, *Angewandte Chemie*, 2014, **53**, 10673-10677.
45. M. H. Robson, A. Serov, K. Artyushkova and P. Atanassov, *Electrochimica Acta*, 2013, **90**, 656-665.
46. Y. Hu, J. O. Jensen, W. Zhang, L. N. Cleemann, W. Xing, N. J. Bjerrum and Q. Li, *Angewandte Chemie*, 2014, **53**, 3675-3679.
